# Supplementary material
Source: PubMed Central journal article supplement (PMC10071652)

**Figure S1. Directed acyclic graph for causal mediation analysis of ADI as a mediator of the association between race and survival**

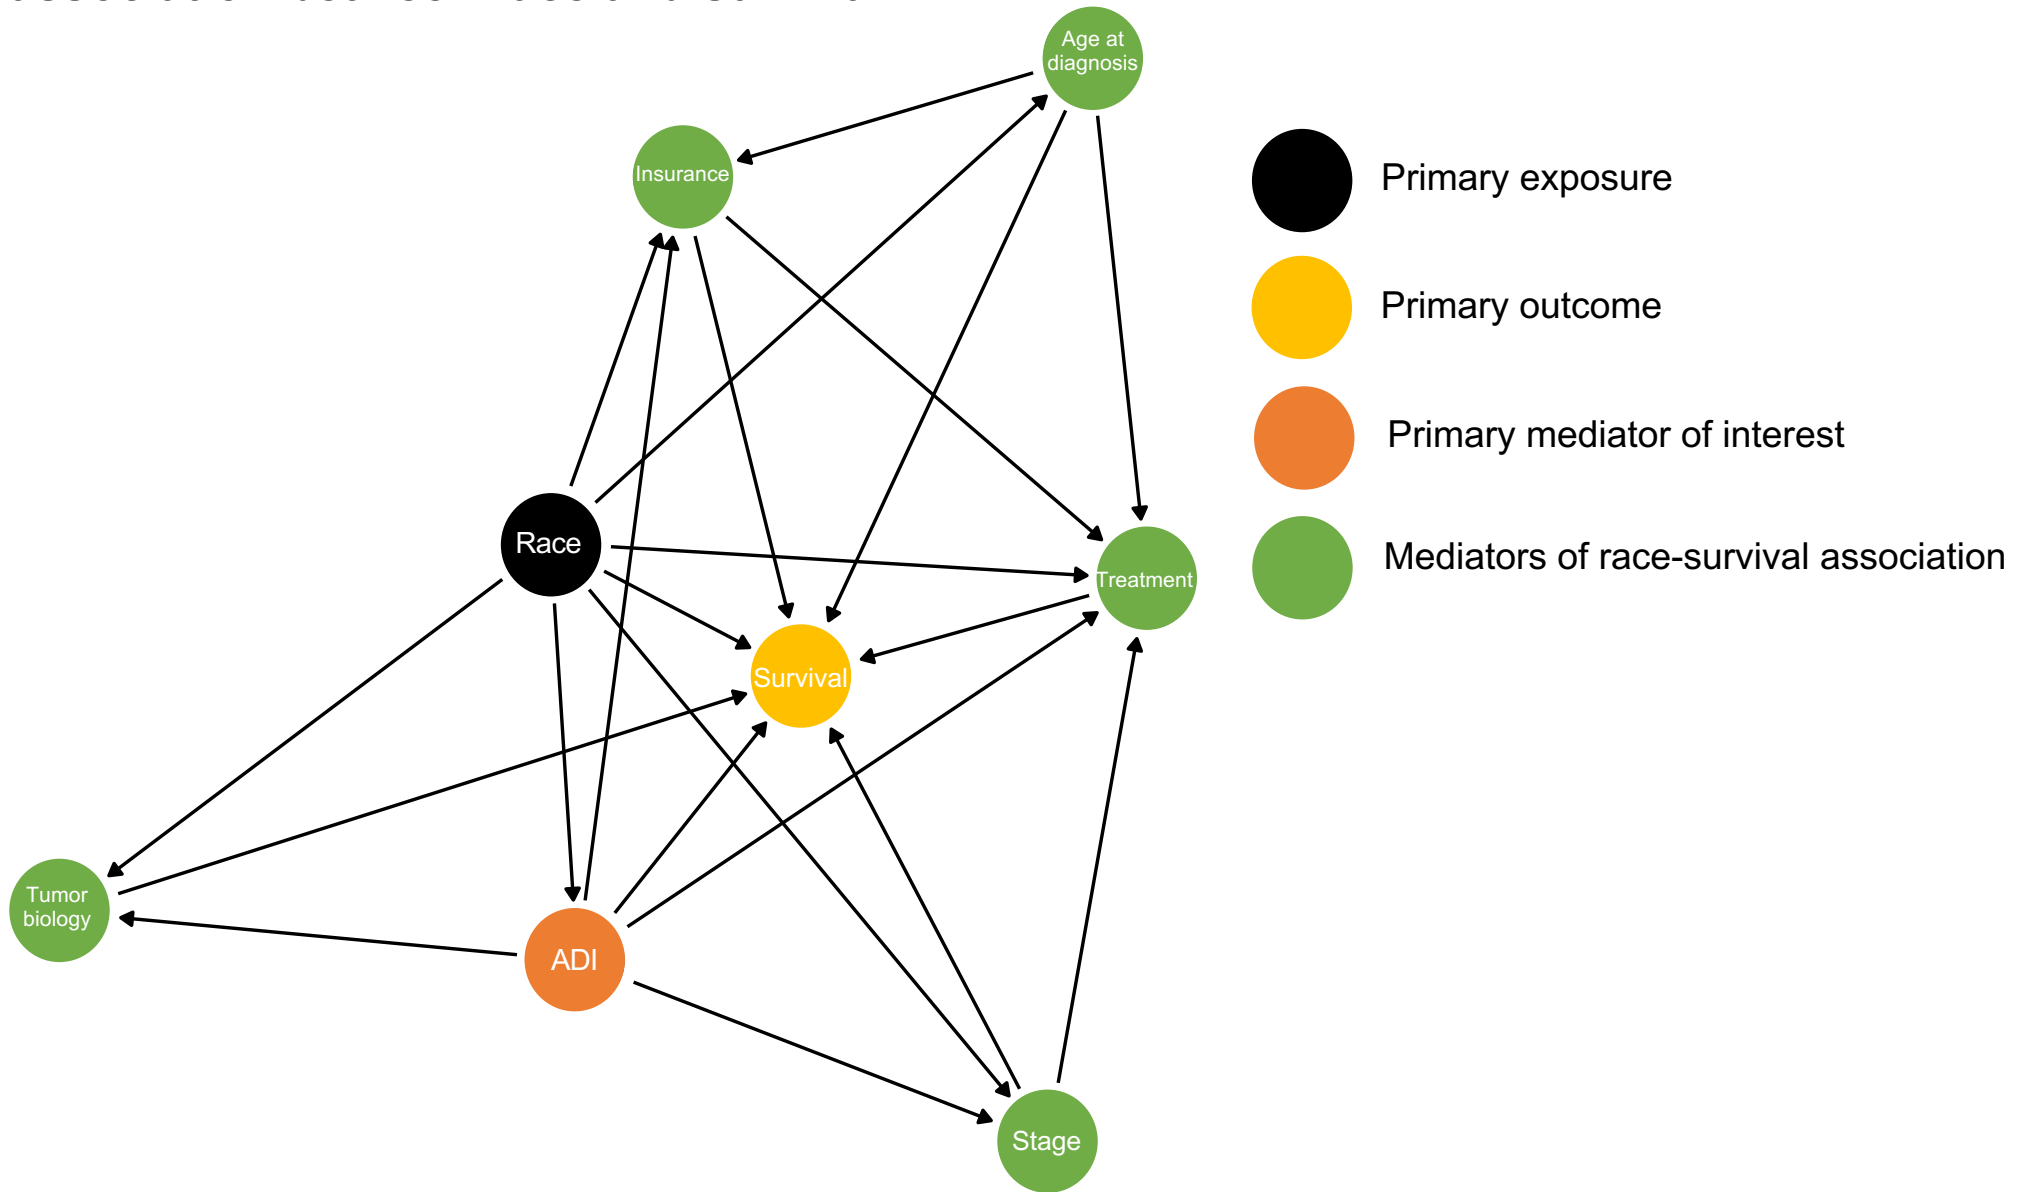

Supplement: NIHMS1866499-supplement-1.pdf [file NIHMS1866499-supplement-1.pdf]
